# Supplementary material for: Platinum-Based Neoadjuvant Chemotherapy for Breast Cancer With BRCA Mutations: A Meta-Analysis
Source: PubMed Central journal article supplement (PMC7693629; doi:10.3389/fonc.2020.592998), 2020-11-09

Begg's funnel plot with pseudo 95% confidence limits

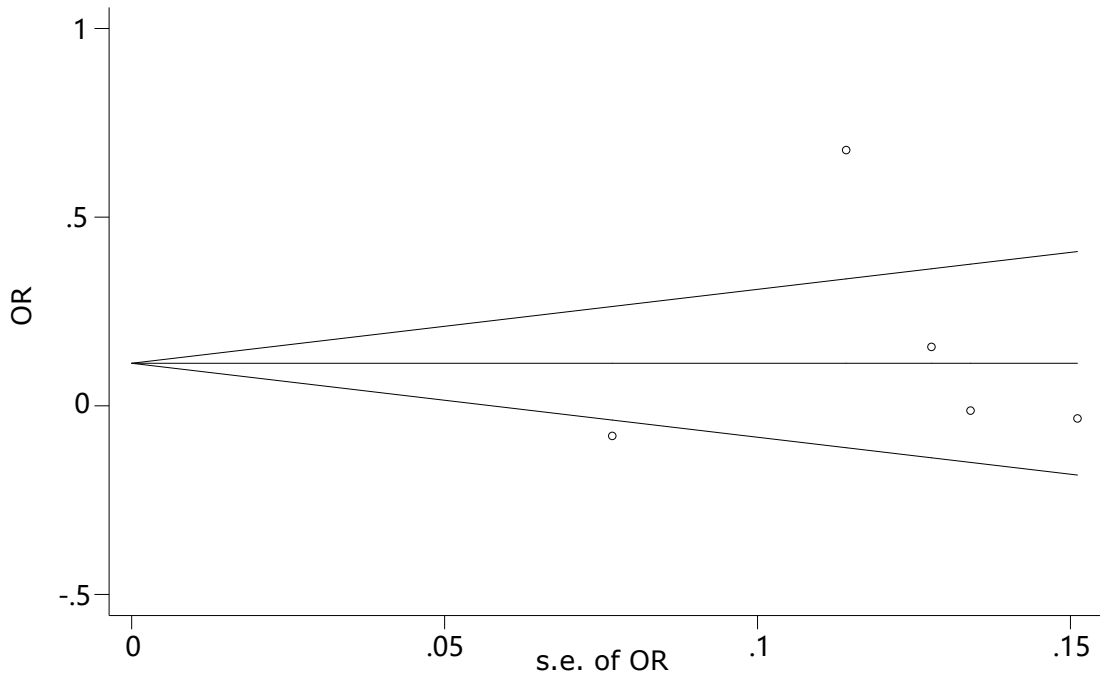

Supplement: DataSheet_1.pdf [file DataSheet_1.pdf]
